# Supplementary material for: Biological Synthesis, Characterization, and Therapeutic Potential of S. commune-Mediated Gold Nanoparticles
Source: MDPI journal article supplement (doi:10.3390/biom13121785), 2023-12-13
Supplement: s1 [file s1]

## Supplementary File

### Pharmacological role of AuNPs (2 to 100 nm)

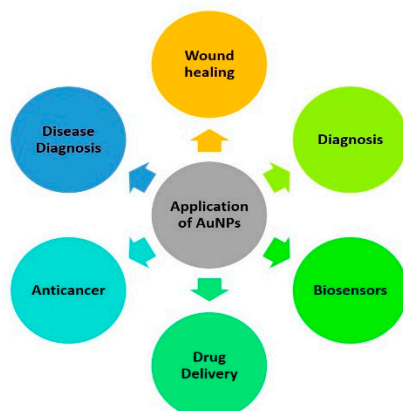

#### Our Unique Approach

- Fungi are **extracellular enzyme secretors**, facile biomass management
- *S. commune* produce a wide range of helpful metabolites having **anti-cancer, antibacterial, anti-inflammatory**, and **antiparasitic** features.
- **No information** was reported on the synthesis of AuNPs using *S. commune*.

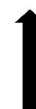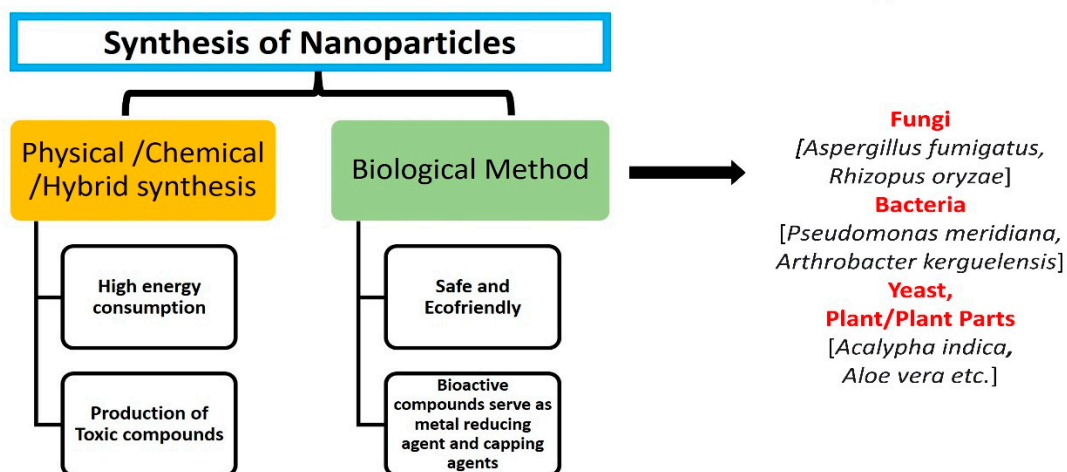

Supplementary Figure S1. Application of gold nanoparticles and its mode of synthesis

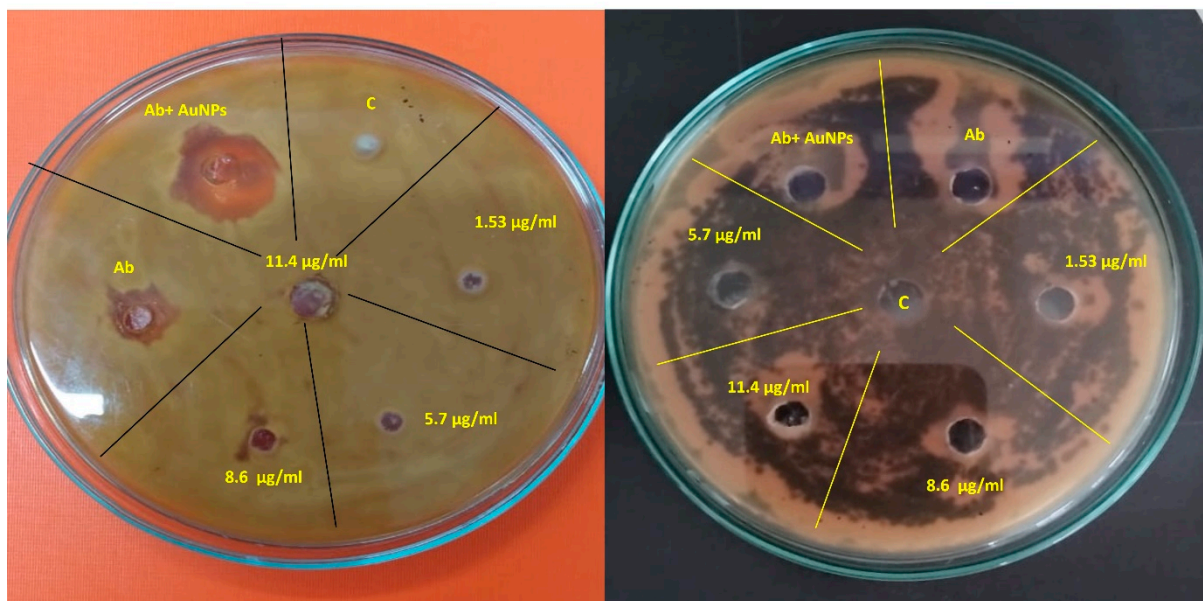

**Supplementary Figure S2.** Antifungal activity of gold nanoparticles (a) *Trichoderma sp.* (b) *A. flavus*
